# Supplementary material
Source: MDPI journal article supplement (https://www.mdpi.com/2073-4395/11/2/338)
Supplement: s1 [file s1]

Article

# Title: Effect of H<sub>2</sub>O-based low pressure plasma (LPP) treatment on the germination of Bambara groundnut seeds

Naeem Ahmed<sup>1</sup>, Asad Masood<sup>1</sup>, Kim S. Siow<sup>1\*</sup>, M. F. Mohd Razip Wee<sup>1</sup>, R.Z. Auliya<sup>1</sup>, W. K. Ho <sup>2</sup>

**Table S 1.** Germination potential (% , first count, day 5), germination percentage (% , final count, day 8), root length (mm), shoot length (mm), and seed vigor index (SVI) of Bambara groundnut seeds (H<sub>2</sub>O-plasma treated and control). Experiments were performed in five replicates, n=5 (note: 20 seeds weighing ~ 5 g were used per replicate).

| Power (W) and time (sec) | Germination percentage (%) | Germination potential (%) | Root length (mm) | Shoot length (mm) | Seed vigor index (SVI) |
|--------------------------|----------------------------|---------------------------|------------------|-------------------|------------------------|
| control                  | 68±6                       | 54±3                      | 28.8±1.2         | 30.0±1.4          | 2022±159               |
| 10 W 10 s                | 83±4                       | 64±3                      | 42.0±1.3         | 36.2±1.4          | 3022±204               |
| 10 W 20 s                | 78±4                       | 60±4                      | 41.2±1.2         | 35.1±0.9          | 2746±171               |
| 10 W 30 s                | 70±3                       | 54±3                      | 39.8±1.0         | 34.2±0.6          | 2419±110               |
| 30 W 10 s                | 73±5                       | 56±4                      | 39.6±1.3         | 33.0±1.3          | 2411±221               |
